# Supplementary material for: Controlled packing of chiral assembly scaffolds to promote chiral J-aggregation of carbocyanine dyes
Source: Royal Society of Chemistry journal article supplement (doi:10.1039/d3cc03394e), 2023-01-01
Supplement: d3cc03394e1.pdf [file d3cc03394e1.pdf]

## Controlled packing of chiral assembly scaffolds to promote chiral J-aggregation of carbocyanine dyes

Naoya Ryu,<sup>\*a</sup> Yusei Yamamoto,<sup>b</sup> Yutaka Okazaki,<sup>c</sup> Nanami Hano,<sup>b,d</sup> Yuki Iwamoto,<sup>b</sup>  
Tomohiro Shirotsaki,<sup>a</sup> Shoji Nagaoka,<sup>a,b</sup> Reiko Oda,<sup>d,e,f</sup> Hirotaka Ihara<sup>b</sup> and Makoto Takafuji<sup>b,f</sup>

<sup>a</sup> *Materials Development Department, Kumamoto Industrial Research Institute  
3-11-38 Higashimachi, Higashi-ku, Kumamoto 862-0901, Japan*

<sup>b</sup> *Department of Applied Chemistry and Biochemistry, Kumamoto University  
2-39-1 Kurokami, Chuo-ku, Kumamoto 860-8555, Japan*

<sup>c</sup> *International Advanced Energy Science Research and Education Centre,  
Graduate School of Energy Science, Kyoto University  
Yoshida-Honmachi, Sakyo-ku, Kyoto 606-8501, Japan*

<sup>d</sup> *Université de Bordeaux, CNRS, Bordeaux INP, CBMN, UMR 5248  
Pessac 33600, France*

<sup>e</sup> *WPI-Advanced Institute for Materials Research, Tohoku University  
Katahira, Aoba-Ku, Sendai 980-8577, Japan*

<sup>f</sup> *International Research Organization for Advanced Science & Technology (IROAST),  
Kumamoto University  
2-39-1 Kurokami, Chuo-ku, Kumamoto 860-8555, Japan*

n-ryu@kumamoto-iri.jp

## Experimental details

### Materials

Cy1 [5,5'-dimethyl-3,3'-bis(3-sulfopropyl)thiacyanine ammonium] was purchased from Merck KGaA (Darmstadt, Germany) and was used as received. Cy2 [3,3'-bis(3-sulfopropyl)-9-ethylthiacarbocyanine triethylammonium] was purchased from H.W. Sands Corp. (Florida, USA) and was used as received. Cy3 [5,5'-dichloro-3,3'-bis(4-sulfobutyl)-10-phenylthiacarbocyanine triethylammonium] was purchased from FEW Chemicals GmbH (Bitterfeld-Wolfen, Germany) and was used as received. Other chemicals were also purchased from commercial sources and were used without further purification. Millipore deionised water was used for all experiments.

### Synthesis and structure confirmation of lysine- and ornithine-derived amphiphiles

$N^{\omega},N^{\epsilon}$ -Dihexadecanoyl-L-lysine (16-Ly-OH) was synthesised using a previously reported method.<sup>18</sup>  $N^{\omega},N^{\epsilon}$ -Didodecanoyl-L-lysine (12-Ly-OH),  $N^{\omega},N^{\epsilon}$ -ditetradecanoyl-L-lysine (14-Ly-OH), and  $N^{\omega},N^{\epsilon}$ -didodecanoyl-L-ornithine (12-Or-OH) were also synthesised using the same procedure with lauroyl chloride, myristoyl chloride, and L-ornithine as the starting materials. These compounds were reacted with 3-bromopropylamine in the presence of diethyl cyanophosphonate (DEPC) and  $N,N$ -diisopropylethylamine (DIPEA) in chloroform. The resulting product was reacted with excess pyridine or trimethylamine to afford the desired lysine- and ornithine-derived amphiphiles (Scheme S1).

Their chemical structures were confirmed *via*  $^1\text{H}$  and  $^{13}\text{C}$  NMR spectroscopy using a JNM-ECZ 400R Fourier transform NMR spectrometer (JEOL Ltd., Tokyo, Japan), attenuated total reflectance Fourier-transform infrared spectroscopy (ATR-FTIR) using an FT/IR-6300 FTIR spectrometer (JASCO Corp., Tokyo, Japan) equipped with an ATR Pro450-S (JASCO), and elemental analysis (EA) using a vario MICRO Cube elemental analyser (Elementar Japan K.K., Yokohama, Japan).

12-Ly [1-(3-( $N^{\omega},N^{\epsilon}$ -didodecanoyl-L-lysynamido)propyl)pyridinium bromide]: white solid; 33% overall yield from 12-Ly-OH; m.p. 115–119 °C;  $^1\text{H}$  NMR (400 MHz,  $\text{CDCl}_3$ , 50 °C):  $\delta$  = 0.88 (t, 6H,  $J$  = 6.6 Hz;  $\text{CH}_3 \times 2$ ), 1.25 (s, 32H;  $\text{CH}_3(\text{CH}_2)_8 \times 2$ ), 1.42–1.45 (m, 2H;  $\text{CHCH}_2\text{CH}_2$ ), 1.51–1.64 (m, 6H;  $\text{CH}(\text{CH}_2)_2\text{CH}_2$ ,  $\text{CH}_3(\text{CH}_2)_8\text{CH}_2 \times 2$ ), 1.82–1.83 (m, 2H;  $\text{CHCH}_2$ ), 2.19 (t, 2H,  $J$  = 7.8 Hz;  $\text{CH}_2\text{CO}$ ), 2.33–2.37 (m, 2H;  $\text{CH}_2\text{CO}$ ), 2.39–2.44 (m, 2H;  $\text{CH}_2\text{CH}_2\text{N}$ ), 3.20–3.29 (m, 3H;  $\text{NHCH}_2 \times 3/2$ ), 3.40–3.51 (m, 1H;  $\text{NHCH}_2 \times 1/2$ ), 4.38 (q, 1H,  $J$  = 7.2 Hz;  $\text{CH}$ ), 5.03 (t, 2H,  $J$  = 6.7 Hz;  $\text{CH}_2\text{N}$ ), 6.29 (s, 1H;  $\text{NHCH}_2$ ), 7.42 (d, 1H,  $J$  = 6.4 Hz;  $\text{NHCH}$ ), 8.06 (t, 2H,  $J$  = 7.1 Hz;  $\text{CHCHNCHCH}$ ), 8.21 (t, 1H,  $J$  = 4.8 Hz;  $\text{NHCH}_2$ ), 8.44 (t, 1H,  $J$  = 7.8 Hz;  $\text{NCHCHCH}$ ), 9.61 (d, 2H,  $J$  = 6.0 Hz;  $\text{CHNCH}$ ) ppm (Fig. S1a);  $^{13}\text{C}$  NMR (100 MHz,  $\text{CDCl}_3$ , 50 °C):  $\delta$  = 14.15 ( $\text{CH}_3$ ), 22.78 ( $\text{CH}_3\text{CH}_2$ ), 23.08 ( $\text{CH}_2$ ), 26.01 ( $\text{CH}_2$ ), 28.99 ( $\text{CH}_2$ ), 29.45 ( $\text{CH}_2$ ), 29.59 ( $\text{CH}_2$ ), 29.76 ( $\text{CH}_2$ ), 31.76 ( $\text{CHCH}_2$ ), 32.03 ( $\text{CH}_2$ ), 35.71 ( $\text{CH}_2\text{CO}$ ), 36.74 ( $\text{CH}_2\text{CO}$ ), 36.97 ( $\text{NHCH}_2$ ), 38.84 ( $\text{NHCH}_2$ ), 54.52 ( $\text{CH}_2\text{N}$ ), 59.43 ( $\text{CH}$ ), 128.41 ( $\text{NCHCH}$ ), 144.98 ( $\text{NCH}$ ), 145.84 ( $\text{NCHCHCH}$ ), 173.85 ( $\text{CO}$ ), 173.97 ( $\text{CO}$ ), 174.55 ( $\text{CO}$ ) ppm (Fig. S2a); IR (ATR):  $\tilde{\nu}$  = 3311 ( $\nu_{\text{N-H}}$ ), 2954 ( $\nu_{\text{C-H}}$ ), 2916 ( $\nu_{\text{C-H}}$ ), 2871 ( $\nu_{\text{C-H}}$ ), 2848 ( $\nu_{\text{C-H}}$ ), 1635 ( $\nu_{\text{C=O}}$ ), 1554 ( $\delta_{\text{N-H}}$ ), 1462 ( $\delta_{\text{C-H}}$ )  $\text{cm}^{-1}$  (Fig. S3a); EA: calcd for  $\text{C}_{38}\text{H}_{69}\text{N}_4\text{O}_3\text{Br} \cdot 4.0\text{H}_2\text{O}$ : C 58.37, H 9.93, N 7.17%; found: C 58.32, H 9.84, N 7.01%.

14-Ly [1-(3-( $N^{\omega},N^{\epsilon}$ -ditetradecanoyl-L-lysynamido)propyl)pyridinium bromide]: white solid; 37% overall

yield from 14-Ly-OH; m.p. 121–126 °C; <sup>1</sup>H NMR (400 MHz, CDCl<sub>3</sub>, 50 °C): δ = 0.88 (t, 6H, *J* = 6.9 Hz; CH<sub>3</sub> × 2), 1.25 (s, 40H; CH<sub>3</sub>(CH<sub>2</sub>)<sub>10</sub> × 2), 1.41–1.48 (m, 2H; CHCH<sub>2</sub>CH<sub>2</sub>), 1.52–1.66 (m, 6H; CH(CH<sub>2</sub>)<sub>2</sub>CH<sub>2</sub>, CH<sub>3</sub>(CH<sub>2</sub>)<sub>8</sub>CH<sub>2</sub> × 2), 1.83–1.92 (m, 2H; CHCH<sub>2</sub>), 2.19 (t, 2H, *J* = 7.8 Hz; CH<sub>2</sub>CO), 2.34–2.38 (m, 2H; CH<sub>2</sub>CO), 2.40–2.47 (m, 2H; CH<sub>2</sub>CH<sub>2</sub>N), 3.16–3.33 (m, 3H; NHCH<sub>2</sub> × 3/2), 3.45–3.53 (m, 1H; NHCH<sub>2</sub> × 1/2), 4.43 (q, 1H, *J* = 6.9 Hz; CH), 5.08 (t, 2H, *J* = 7.8 Hz; CH<sub>2</sub>N), 6.27 (s, 1H; NHCH<sub>2</sub>), 7.43 (d, 1H, *J* = 7.8 Hz; NHCH), 8.04 (t, 2H, *J* = 7.1 Hz; CHCHNCHCH), 8.25 (t, 1H, *J* = 5.5 Hz; NHCH<sub>2</sub>), 8.42 (t, 1H, *J* = 7.8 Hz; NCHCHCH), 9.67 (d, 2H, *J* = 5.5 Hz; CHNCH) ppm (Fig. S1b); <sup>13</sup>C NMR (100 MHz, CDCl<sub>3</sub>, 50 °C): δ = 14.06 (CH<sub>3</sub>), 22.70 (CH<sub>3</sub>CH<sub>2</sub>), 22.91 (CH<sub>2</sub>), 25.94 (CH<sub>2</sub>), 28.78 (CH<sub>2</sub>), 29.39 (CH<sub>2</sub>), 29.50 (CH<sub>2</sub>), 29.70 (CH<sub>2</sub>), 29.74 (CH<sub>2</sub>), 31.48 (CHCH<sub>2</sub>), 31.96 (CH<sub>2</sub>), 35.74 (CH<sub>2</sub>CO), 36.69 (CH<sub>2</sub>CO), 36.92 (NHCH<sub>2</sub>), 38.74 (NHCH<sub>2</sub>), 54.43 (CH<sub>2</sub>N), 59.35 (CH), 128.29 (NCHCH), 144.80 (NCH), 145.79 (NCHCHCH), 173.89 (CO), 174.05 (CO), 174.56 (CO) ppm (Fig. S2b); IR (ATR):  $\tilde{\nu}$  = 3307 ( $\nu_{\text{N-H}}$ ), 2954 ( $\nu_{\text{C-H}}$ ), 2916 ( $\nu_{\text{C-H}}$ ), 2871 ( $\nu_{\text{C-H}}$ ), 2848 ( $\nu_{\text{C-H}}$ ), 1635 ( $\nu_{\text{C=O}}$ ), 1554 ( $\delta_{\text{N-H}}$ ), 1462 ( $\delta_{\text{C-H}}$ ) cm<sup>-1</sup> (Fig. S3b); EA: calcd for C<sub>42</sub>H<sub>77</sub>N<sub>4</sub>O<sub>3</sub>Br·2.7H<sub>2</sub>O: C 61.92, H 10.20, N 6.88%; found: C 61.99, H 9.89, N 6.75%.

16-Ly [1-(3-(*N*<sup>α</sup>,*N*<sup>ε</sup>-dihexadecanoyl-L-lysynamido)propyl)pyridinium bromide]: white solid; 50% overall yield from 16-Ly-OH; m.p. 123–128 °C; <sup>1</sup>H NMR (400 MHz, CDCl<sub>3</sub>, 50 °C): δ = 0.88 (t, 6H, *J* = 6.9 Hz; CH<sub>3</sub> × 2), 1.26 (s, 48H; CH<sub>3</sub>(CH<sub>2</sub>)<sub>12</sub> × 2), 1.41–1.48 (m, 2H; CHCH<sub>2</sub>CH<sub>2</sub>), 1.54–1.65 (m, 6H; CH(CH<sub>2</sub>)<sub>2</sub>CH<sub>2</sub>, CH<sub>3</sub>(CH<sub>2</sub>)<sub>8</sub>CH<sub>2</sub> × 2), 1.79–1.92 (m, 2H; CHCH<sub>2</sub>), 2.19 (t, 2H, *J* = 7.8 Hz; CH<sub>2</sub>CO), 2.37 (t, 2H, *J* = 7.8 Hz; CH<sub>2</sub>CO), 2.40–2.49 (m, 2H; CH<sub>2</sub>CH<sub>2</sub>N), 3.19–3.31 (m, 3H; NHCH<sub>2</sub> × 3/2), 3.47–3.55 (m, 1H; NHCH<sub>2</sub> × 1/2), 4.40–4.45 (m, 1H; CH), 5.03–5.10 (m, 2H; CH<sub>2</sub>N), 6.09 (s, 1H; NHCH<sub>2</sub>), 7.27–7.29 (m, 1H; NHCH), 8.04 (t, 2H, *J* = 7.1 Hz; CHCHNCHCH), 8.13 (s, 1H; NHCH<sub>2</sub>), 8.42 (t, 1H, *J* = 7.8 Hz; NCHCHCH), 9.57 (d, 2H, *J* = 6.4 Hz; CHNCH) ppm (Fig. S1c); <sup>13</sup>C NMR (100 MHz, CDCl<sub>3</sub>, 50 °C): δ = 14.06 (CH<sub>3</sub>), 22.70 (CH<sub>3</sub>CH<sub>2</sub>), 22.95 (CH<sub>2</sub>), 25.93 (CH<sub>2</sub>), 28.84 (CH<sub>2</sub>), 29.39 (CH<sub>2</sub>), 29.50 (CH<sub>2</sub>), 29.75 (CH<sub>2</sub>), 31.50 (CHCH<sub>2</sub>), 31.97 (CH<sub>2</sub>), 35.63 (CH<sub>2</sub>CO), 36.69 (CH<sub>2</sub>CO), 36.92 (NHCH<sub>2</sub>), 38.73 (NHCH<sub>2</sub>), 54.44 (CH<sub>2</sub>N), 59.36 (CH), 128.28 (NCHCH), 144.80 (NCH), 145.78 (NCHCHCH), 173.76 (CO), 173.95 (CO), 174.49 (CO) ppm (Fig. S2c); IR (ATR):  $\tilde{\nu}$  = 3307 ( $\nu_{\text{N-H}}$ ), 2954 ( $\nu_{\text{C-H}}$ ), 2916 ( $\nu_{\text{C-H}}$ ), 2871 ( $\nu_{\text{C-H}}$ ), 2848 ( $\nu_{\text{C-H}}$ ), 1633 ( $\nu_{\text{C=O}}$ ), 1556 ( $\delta_{\text{N-H}}$ ), 1462 ( $\delta_{\text{C-H}}$ ) cm<sup>-1</sup> (Fig. S3c); EA: calcd for C<sub>46</sub>H<sub>85</sub>N<sub>4</sub>O<sub>3</sub>Br·2.5H<sub>2</sub>O: C 63.72, H 10.46, N 6.46%; found: C 63.72, H 10.07, N 6.38%.

12-Or [1-(3-(*N*<sup>α</sup>,*N*<sup>δ</sup>-didodecanoyl-L-ornithinamido)propyl)pyridinium bromide]: white solid; 43% overall yield from 12-Or-OH; m.p. 114–120 °C; <sup>1</sup>H NMR (400 MHz, CDCl<sub>3</sub>, 50 °C): δ = 0.88 (t, 6H, *J* = 6.9 Hz; CH<sub>3</sub> × 2), 1.25 (s, 32H; CH<sub>3</sub>(CH<sub>2</sub>)<sub>8</sub> × 2), 1.55–1.70 (m, 6H; CHCH<sub>2</sub>CH<sub>2</sub>, CH<sub>3</sub>(CH<sub>2</sub>)<sub>8</sub>CH<sub>2</sub> × 2), 1.78–1.85 (m, 1H; CHCH<sub>2</sub> × 1/2), 1.88–1.96 (m, 1H; CHCH<sub>2</sub> × 1/2), 2.20 (t, 2H, *J* = 7.8 Hz; CH<sub>2</sub>CO), 2.33–2.35 (m, 2H; CH<sub>2</sub>CO), 2.37–2.45 (m, 2H; CH<sub>2</sub>CH<sub>2</sub>N), 3.20–3.35 (m, 3H; NHCH<sub>2</sub> × 3/2), 3.44–3.52 (m, 1H; NHCH<sub>2</sub> × 1/2), 4.47–4.52 (m, 1H; CH), 5.05 (t, 2H, *J* = 7.5 Hz; CH<sub>2</sub>N), 6.60 (t, 1H, *J* = 5.7 Hz; NHCH<sub>2</sub>), 7.30 (d, 1H, *J* = 7.8 Hz; NHCH), 8.05 (t, 2H, *J* = 7.1 Hz; CHCHNCHCH), 8.32 (t, 1H, *J* = 5.5 Hz; NHCH<sub>2</sub>), 8.42 (t, 1H, *J* = 7.8 Hz; NCHCHCH), 9.60 (d, 2H, *J* = 6.0 Hz; CHNCH) ppm (Fig. S1d); <sup>13</sup>C NMR (100 MHz, CDCl<sub>3</sub>, 50 °C): δ = 14.06 (CH<sub>3</sub>), 22.70 (CH<sub>3</sub>CH<sub>2</sub>), 22.95 (CH<sub>2</sub>), 25.93 (CH<sub>2</sub>), 28.84 (CH<sub>2</sub>), 29.39 (CH<sub>2</sub>), 29.50 (CH<sub>2</sub>), 29.75 (CH<sub>2</sub>), 31.50 (CHCH<sub>2</sub>), 31.97 (CH<sub>2</sub>), 35.63 (CH<sub>2</sub>CO), 36.69 (CH<sub>2</sub>CO), 36.92 (NHCH<sub>2</sub>), 38.73 (NHCH<sub>2</sub>), 54.44 (CH<sub>2</sub>N), 59.36 (CH), 128.28 (NCHCH), 144.80 (NCH), 145.78 (NCHCHCH), 173.76 (CO), 173.95 (CO),

174.49 (CO) ppm (Fig. S2d); IR (ATR):  $\tilde{\nu} = 3307$  ( $\nu_{\text{N-H}}$ ), 2954 ( $\nu_{\text{C-H}}$ ), 2916 ( $\nu_{\text{C-H}}$ ), 2871 ( $\nu_{\text{C-H}}$ ), 2848 ( $\nu_{\text{C-H}}$ ), 1633 ( $\nu_{\text{C=O}}$ ), 1556 ( $\delta_{\text{N-H}}$ ), 1462 ( $\delta_{\text{C-H}}$ )  $\text{cm}^{-1}$  (Fig. S3d); EA: calcd for  $\text{C}_{37}\text{H}_{67}\text{N}_4\text{O}_3\text{Br}\cdot 2.0\text{H}_2\text{O}$ : C 60.72, H 9.78, N 7.66%; found: C 60.66, H 9.58, N 7.52%.

12-Ly-Am [1-(3-( $N^{\alpha},N^{\beta}$ -didodecanoyl-L-lysineamido)propyl)- $N,N,N$ -trimethylammonium bromide]: white solid; 26% overall yield from 12-Ly-OH; m.p. 125–127 °C;  $^1\text{H}$  NMR (400 MHz,  $\text{CD}_3\text{OD}$ , 50 °C):  $\delta = 0.90$  (t, 6H,  $J = 6.9$  Hz;  $\text{CH}_3 \times 2$ ), 1.30 (s, 32H;  $\text{CH}_3(\text{CH}_2)_8 \times 2$ ), 1.38–1.45 (m, 2H;  $\text{CHCH}_2\text{CH}_2$ ), 1.50–1.55 (m, 2H;  $\text{CH}(\text{CH}_2)_2\text{CH}_2$ ), 1.57–1.65 (m, 4H;  $\text{CH}_3(\text{CH}_2)_8\text{CH}_2 \times 2$ ), 1.66–1.82 (m, 2H;  $\text{CHCH}_2$ ), 1.95–2.07 (m, 2H;  $\text{CH}_2\text{CH}_2\text{N}$ ), 2.17 (t, 2H,  $J = 7.5$  Hz;  $\text{CH}_2\text{CO}$ ), 2.24–2.28 (m, 2H;  $\text{CH}_2\text{CO}$ ), 3.14 (s, 9H;  $\text{NCH}_3 \times 3$ ), 3.14 (t, 2H,  $J = 7.1$  Hz;  $\text{CH}_2\text{N}$ ), 3.22–3.27 (m, 1H;  $\text{NHCH}_2 \times 1/2$ ), 3.35–3.42 (m, 3H;  $\text{NHCH}_2 \times 3/2$ ), 4.10 (q, 1H,  $J = 4.7$  Hz;  $\text{CH}$ ) ppm (Fig. S1e);  $^{13}\text{C}$  NMR (100 MHz,  $\text{CD}_3\text{OD}$ , 50 °C):  $\delta = 14.33$  ( $\text{CH}_3$ ), 23.63 ( $\text{CH}_3\text{CH}_2$ ), 24.34 ( $\text{CH}_2$ ), 26.36 ( $\text{CH}_2$ ), 30.32 ( $\text{CH}_2$ ), 30.37 ( $\text{CH}_2$ ), 30.42 ( $\text{CH}_2$ ), 30.56 ( $\text{CH}_2$ ), 30.65 ( $\text{CH}_2$ ), 32.21 ( $\text{CHCH}_2$ ), 32.99 ( $\text{CH}_2$ ), 36.85 ( $\text{CH}_2\text{CO}$ ), 37.06 ( $\text{CH}_2\text{CO}$ ), 37.26 ( $\text{NHCH}_2$ ), 39.86 ( $\text{NHCH}_2$ ), 53.82 ( $\text{CH}_3\text{N}$ ), 55.58 ( $\text{CH}$ ), 65.78 ( $\text{NCH}_2$ ), 175.30 (CO), 176.29 (CO), 176.61 (CO) ppm (Fig. S2e); IR (ATR):  $\tilde{\nu} = 3303$  ( $\nu_{\text{N-H}}$ ), 2954 ( $\nu_{\text{C-H}}$ ), 2916 ( $\nu_{\text{C-H}}$ ), 2871 ( $\nu_{\text{C-H}}$ ), 2850 ( $\nu_{\text{C-H}}$ ), 1637 ( $\nu_{\text{C=O}}$ ), 1552 ( $\delta_{\text{N-H}}$ ), 1466 ( $\delta_{\text{C-H}}$ )  $\text{cm}^{-1}$  (Fig. S3e); EA: calcd for  $\text{C}_{36}\text{H}_{73}\text{N}_4\text{O}_3\text{Br}\cdot 4.3\text{H}_2\text{O}$ : C 56.35, H 10.72, N 7.30%; found: C 56.32, H 10.38, N 7.05%.

### Characterisation of self-assembled amphiphiles

The formation of the self-assemblies of 12-Ly, 14-Ly, 16-Ly, 12-Or, and 12-Ly-Am amphiphiles in water was confirmed via scanning transmission electron microscopy (STEM) using a scanning electron microscope SU8600 (Hitachi High-Tech Corp., Tokyo, Japan). The dispersions of the amphiphiles were spotted on carbon-coated copper grids. The samples were then air-dried at 25 °C by blotting excess dispersion and post-stained with osmium tetroxide using an osmium plasma coater OPC60A (Filgen, Inc., Nagoya, Japan).

The gel-to-liquid crystalline phase transition temperature ( $T_m$ ) and transition enthalpy ( $\Delta H$ ) values of the amphiphile assemblies in water were measured *via* differential scanning calorimetry (DSC) measurements using an EXSTAR DSC7020 calorimeter (Hitachi High-Tech). The dispersions (20 mM, 15  $\mu\text{L}$ ) were encapsulated in a silver capsule and scanned using a heating rate of 2.0 °C  $\text{min}^{-1}$ .

FTIR spectra of a 12-Ly dispersion were recorded using an FT/IR-6300 FTIR spectrometer by transmittance at 25 °C. 12-Ly (3.0 mM) was dispersed in heavy water ( $\text{D}_2\text{O}$ ) instead of  $\text{H}_2\text{O}$ , and placed in a demountable liquid cell with  $\text{CaF}_2$  windows.

### Preparation of cyanine dye–amphiphile aqueous mixtures

The amphiphiles were dissolved in water by heating over  $T_m$ s. Then, the cyanine dye aqueous solutions were added to the amphiphile dispersions and heated until the mixture turned homogeneous. The mixtures were cooled to 20 °C and their optical spectral measurements were obtained.

### Optical spectral measurements

UV–visible absorption spectra were recorded using a V-560 UV/VIS spectrophotometer (JASCO) equipped with an ETC-505T temperature controller (JASCO). The circular dichroism (CD) and linear dichroism (LD)

spectra were recorded using a J-820 spectropolarimeter (JASCO) equipped with an LD attachment (LD-403, JASCO) and a PTC-423L temperature controller (JASCO). The emission spectra were recorded using an FP-6600 spectrofluorometer (JASCO) equipped with an EHC-573T temperature controller (JASCO). The circularly polarised luminescence (CPL) spectra were recorded using a CPL-300 spectrofluoropolarimeter (JASCO) equipped with a PTC-423L temperature controller (JASCO). Prior to recording the spectra, the sample solutions were placed in a quartz cell (path length = 0.1 cm for UV–visible absorption, CD, and CPL spectra; 1 × 0.1 cm cell for emission spectra) and incubated at specific temperatures (20–90 °C).

## Supplementary figures

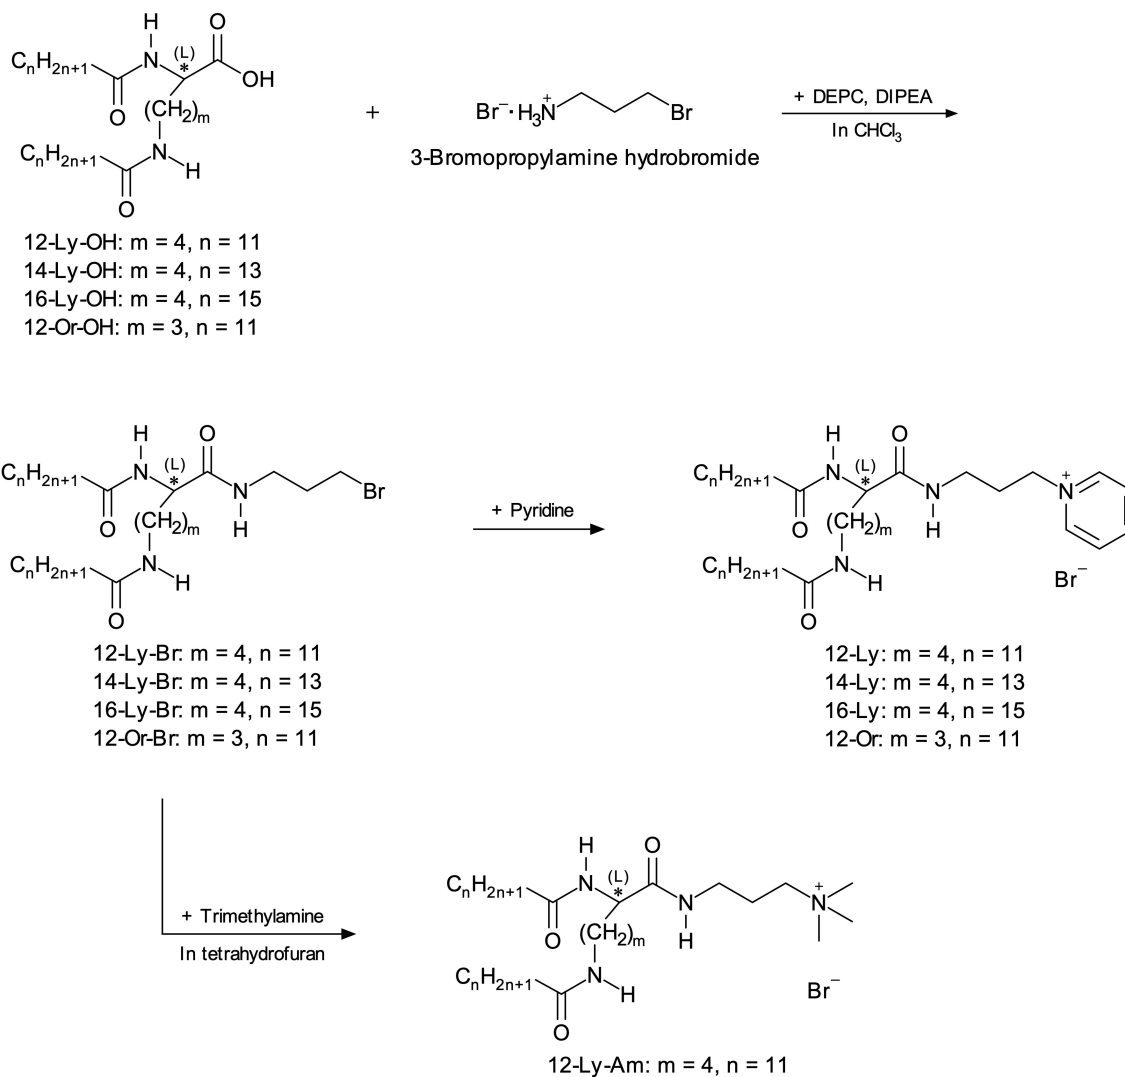

**Scheme S1** Synthesis of lysine- and ornithine-derived amphiphiles.

(a) 12-Ly

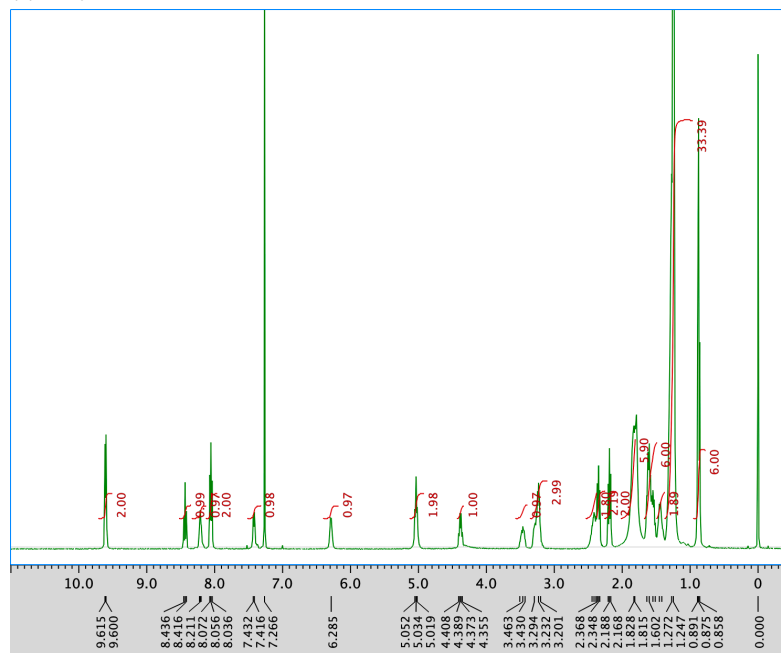

(b) 14-Ly

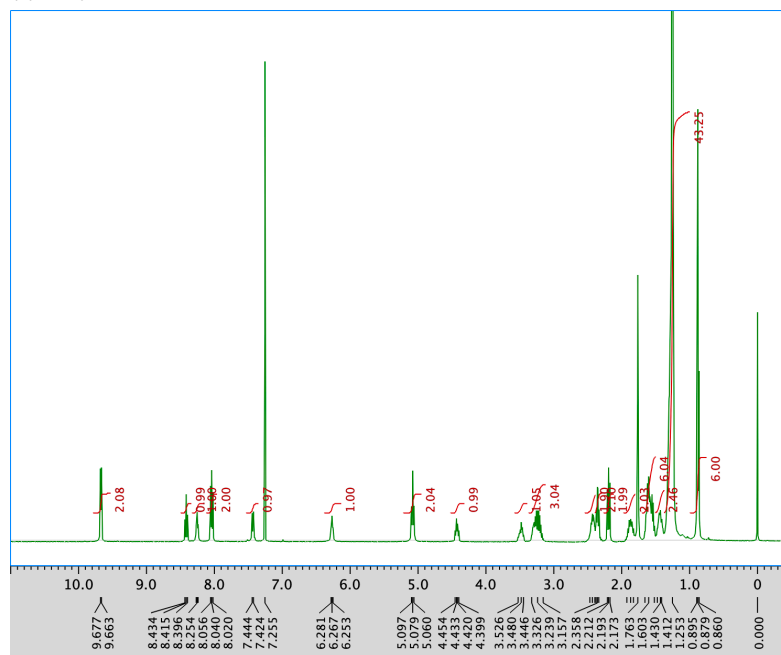

**Fig. S1**  $^1\text{H}$  NMR spectra of (a) 12-Ly, (b) 14-Ly, (c) 16-Ly, and (d) 12-Or in  $\text{CDCl}_3$  and (e) 12-Ly-Am in  $\text{CD}_3\text{OD}$ ; 400 MHz, 50 °C.

(c) 16-Ly

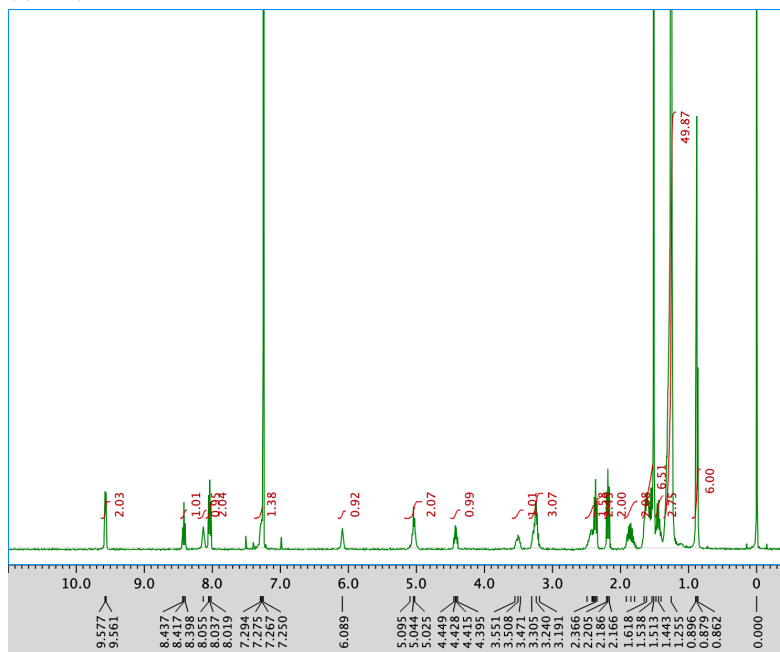

(d) 12-Or

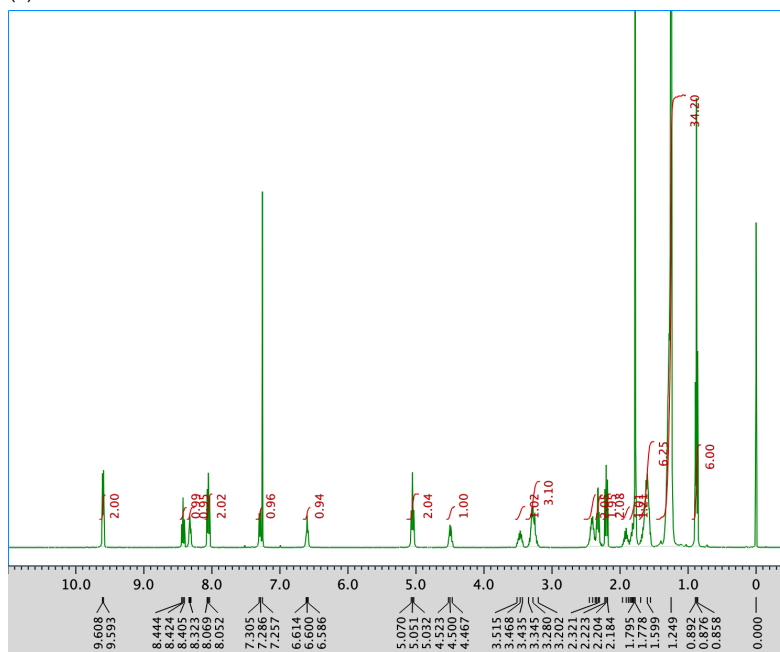

**Fig. S1** (Continued) <sup>1</sup>H NMR spectra of (a) 12-Ly, (b) 14-Ly, (c) 16-Ly, and (d) 12-Or in CDCl<sub>3</sub> and (e) 12-Ly-Am in CD<sub>3</sub>OD; 400 MHz, 50 °C.



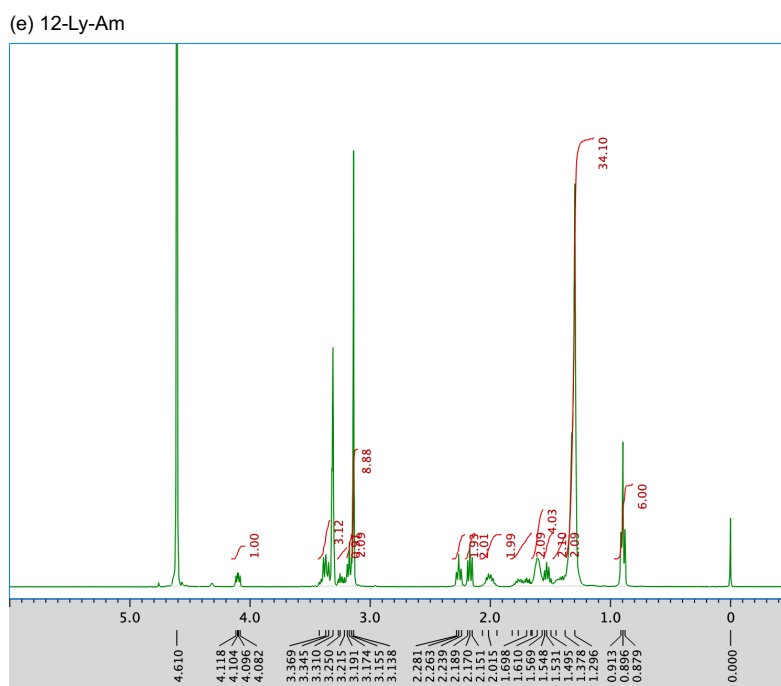

**Fig. S1** (Continued)  $^1\text{H}$  NMR spectra of (a) 12-Ly, (b) 14-Ly, (c) 16-Ly, and (d) 12-Or in  $\text{CDCl}_3$  and (e) 12-Ly-Am in  $\text{CD}_3\text{OD}$ ; 400 MHz, 50  $^\circ\text{C}$ .

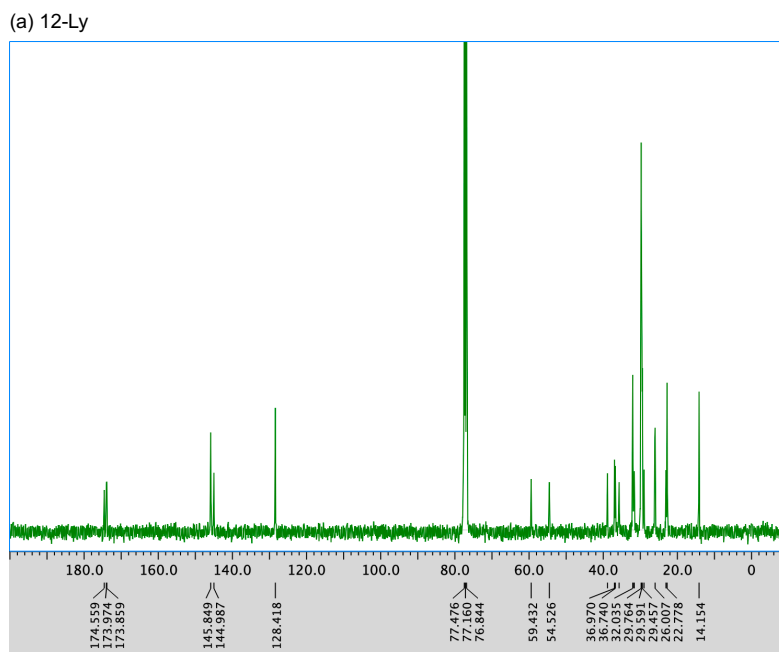

**Fig. S2**  $^{13}\text{C}$  NMR spectra of (a) 12-Ly, (b) 14-Ly, (c) 16-Ly, and (d) 12-Or in  $\text{CDCl}_3$  and (e) 12-Ly-Am in  $\text{CD}_3\text{OD}$ ; 100 MHz, 50  $^\circ\text{C}$ .

(b) 14-Ly

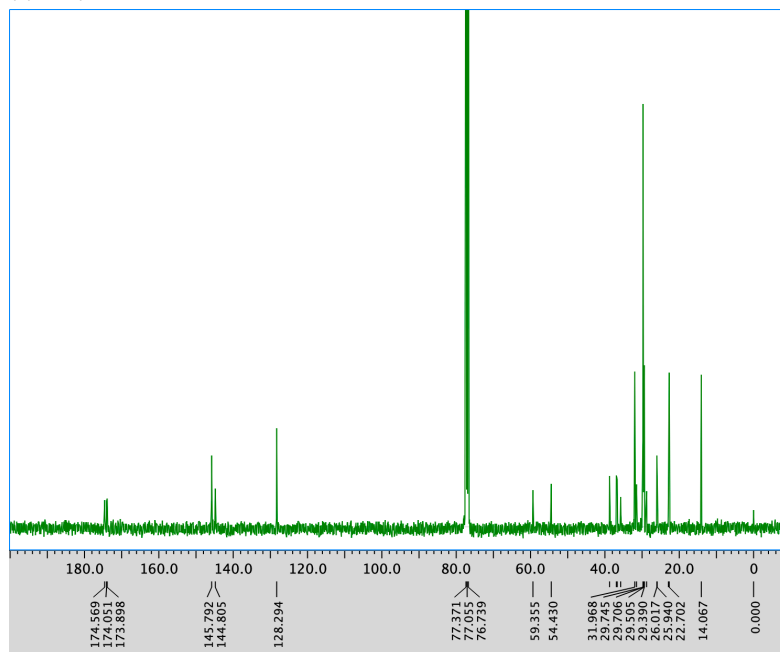

(c) 16-Ly

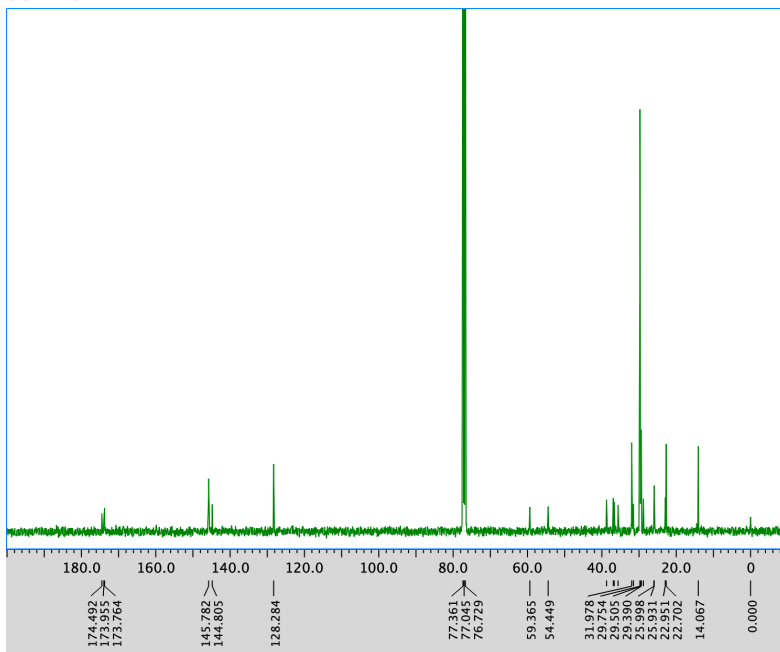

**Fig. S2** (Continued) <sup>13</sup>C NMR spectra of (a) 12-Ly, (b) 14-Ly, (c) 16-Ly, and (d) 12-Or in CDCl<sub>3</sub> and (e) 12-Ly-Am in CD<sub>3</sub>OD; 100 MHz, 50 °C.

(d) 12-Or

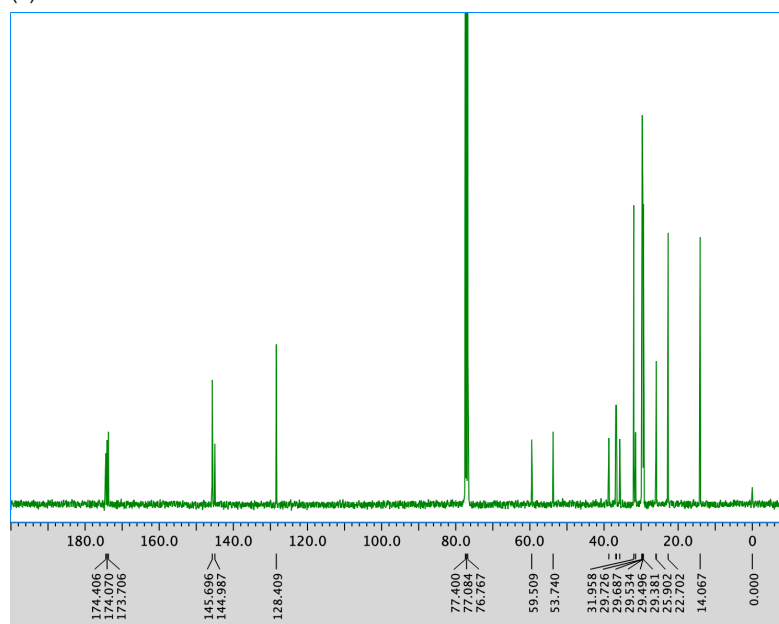

(e) 12-Ly-Am

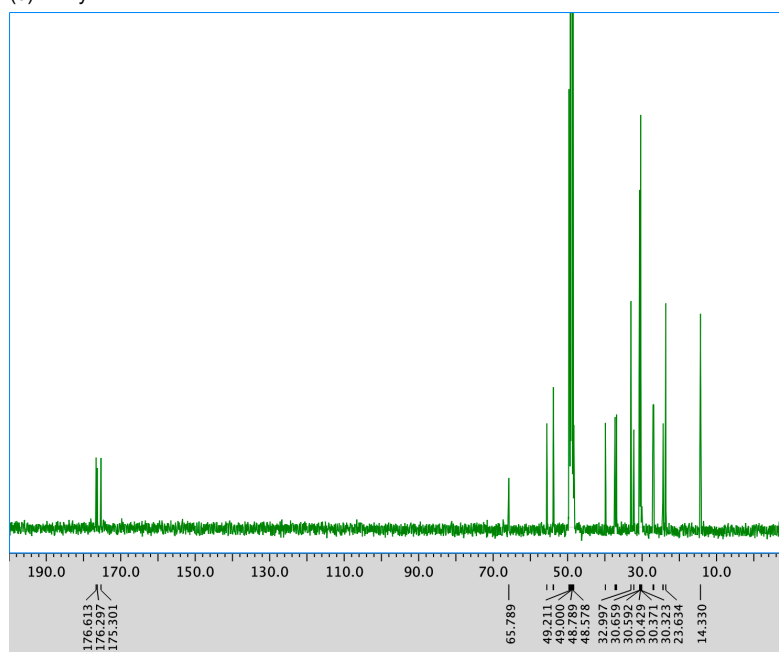

**Fig. S2 (Continued)** <sup>13</sup>C NMR spectra of (a) 12-Ly, (b) 14-Ly, (c) 16-Ly, and (d) 12-Or in CDCl<sub>3</sub> and (e) 12-Ly-Am in CD<sub>3</sub>OD; 100 MHz, 50 °C.

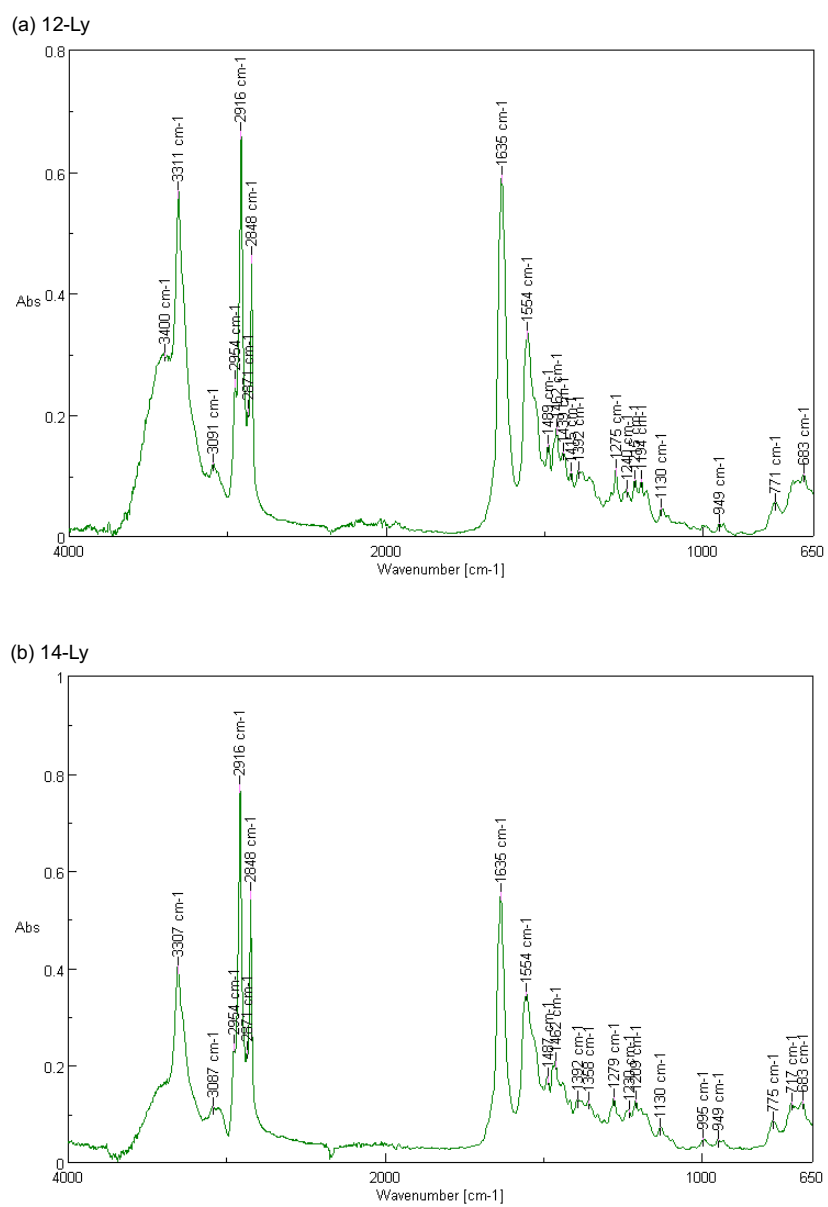

**Fig. S3** ATR-FTIR spectra of (a) 12-Ly, (b) 14-Ly, (c) 16-Ly, (d) 12-Or, and (e) 12-Ly-Am.

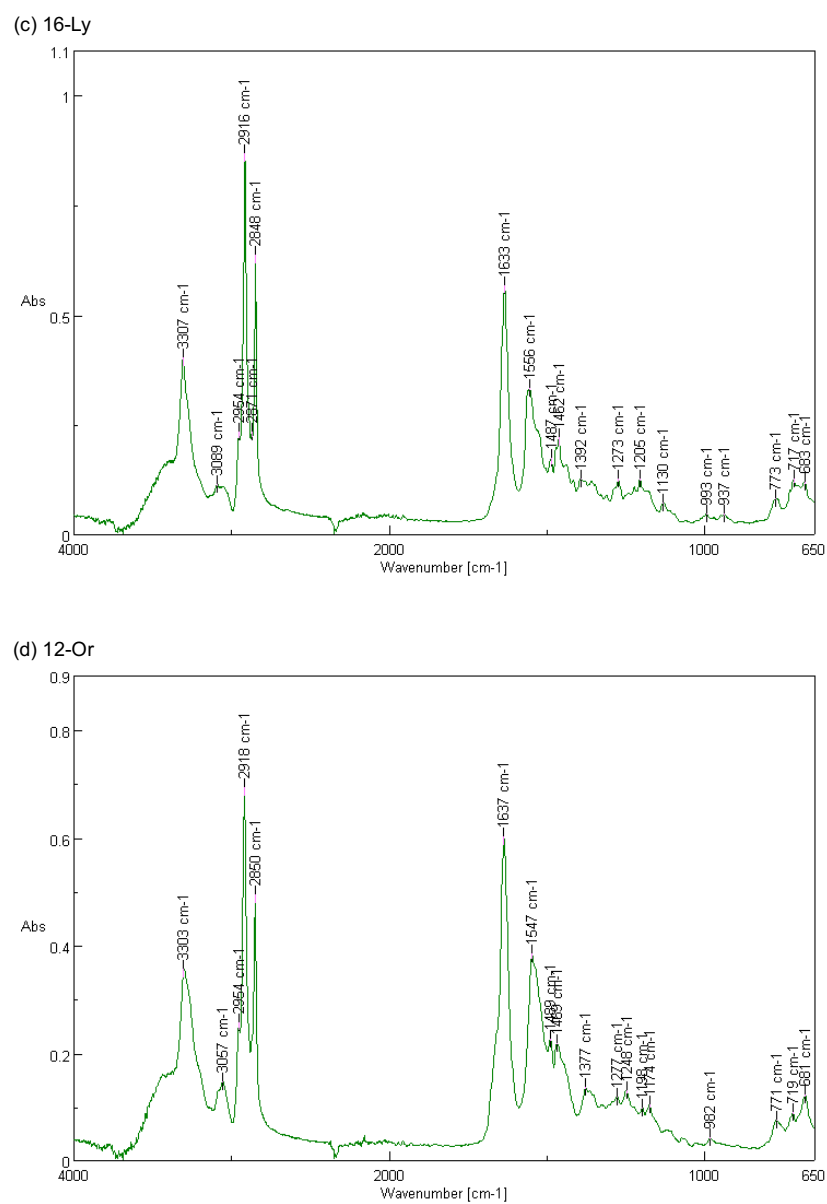

**Fig. S3** (Continued) ATR-FTIR spectra of (a) 12-Ly, (b) 14-Ly, (c) 16-Ly, (d) 12-Or, and (e) 12-Ly-Am.

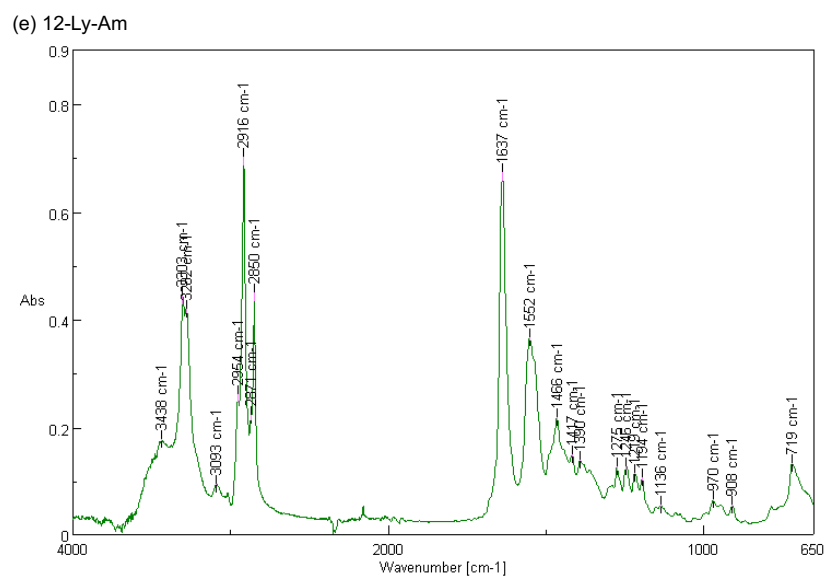

**Fig. S3** (Continued) ATR-FTIR spectra of (a) 12-Ly, (b) 14-Ly, (c) 16-Ly, (d) 12-Or, and (e) 12-Ly-Am.

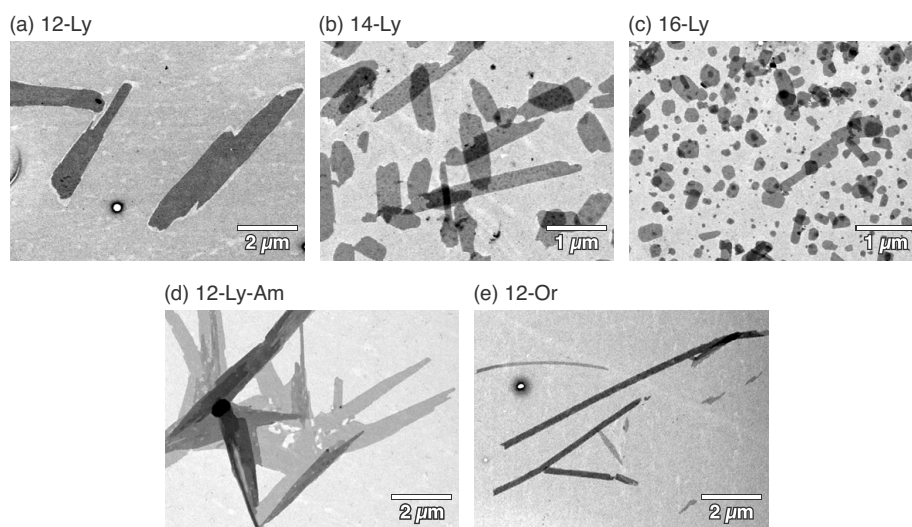

**Fig. S4** STEM images of the cast films of (a) 12-Ly, (b) 14-Ly, (c) 16-Ly, (d) 12-Ly-Am, and (e) 12-Or assemblies prepared from their aqueous dispersions (0.6 mM) and post-stained with OsO<sub>4</sub>.

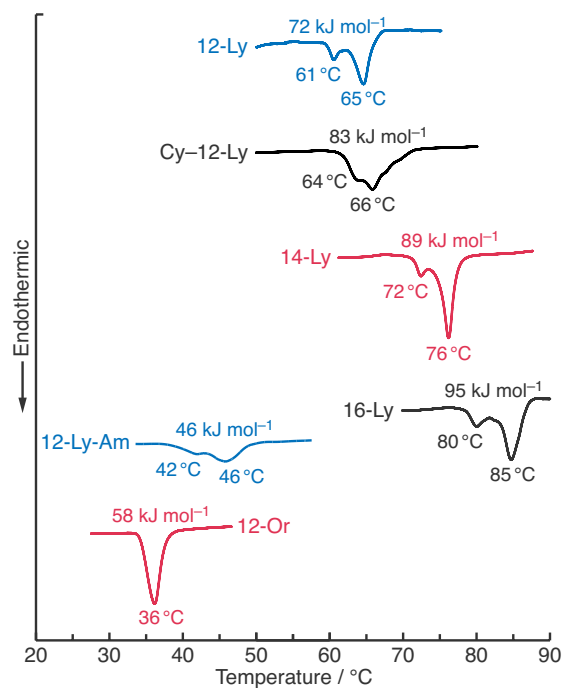

**Fig. S5** DSC thermograms of 12-Ly, 14-Ly, 16-Ly, 12-Ly-Am, and 12-Or (20 mM) without or containing Cy2 (1 mM) in water during heating; heating rate: 2 °C min<sup>-1</sup>.

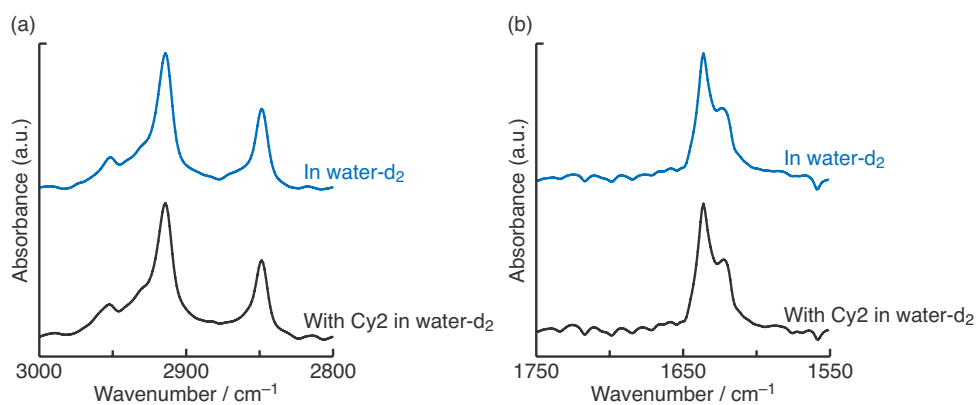

**Fig. S6** FTIR spectra of 12-Ly (3.0 mM) without and containing Cy2 (0.15 mM) in water-d<sub>2</sub> at 25 °C.

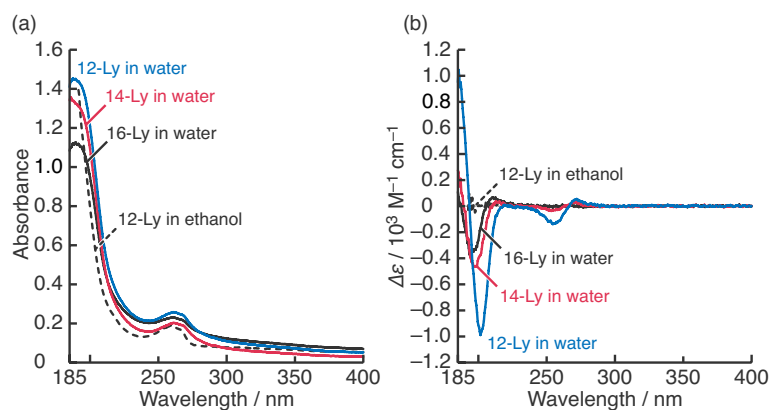

**Fig. S7** (a) UV absorption and (b) CD spectra of 12-, 14-, and 16-Ly (0.6 mM) in water and ethanol at 20 °C; path length: 0.1 cm.

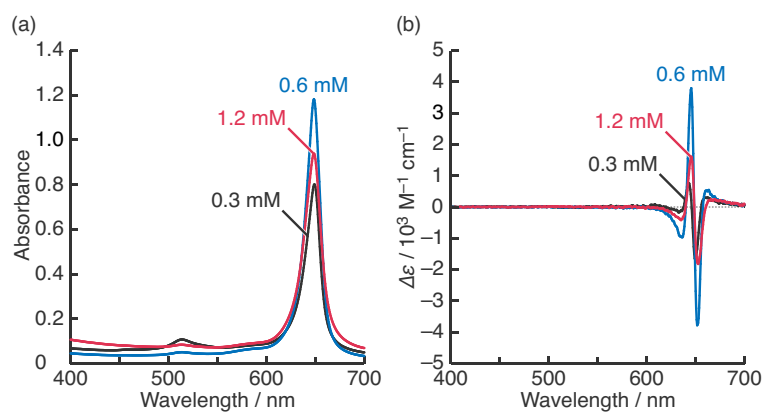

**Fig. S8** (a) Visible absorption and (b) CD spectra of Cy2 (0.03 mM) in the presence of different concentrations of 12-Ly (0.3, 0.6, and 1.2 mM) in water at 20 °C; path length: 0.1 cm.

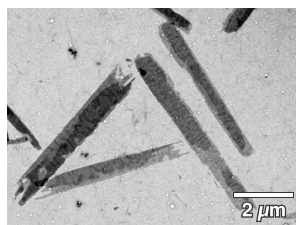

**Fig. S9** STEM image of the cast film of 12-Ly assemblies (0.6 mM) containing Cy2 (0.03 mM) prepared from its aqueous mixture and post-stained with OsO<sub>4</sub>.



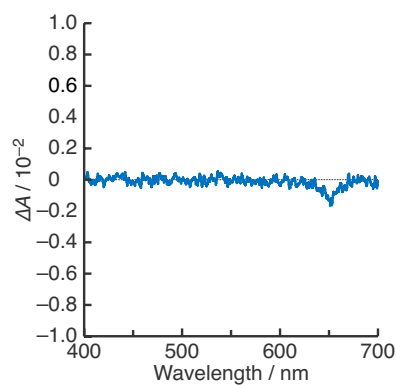

**Fig. S10** LD spectrum of Cy2 (0.03 mM) in the presence of 12-Ly (0.6 mM) in water at 20 °C; path length: 0.1 cm.

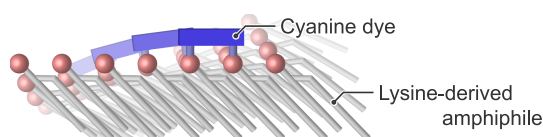

**Fig. S11** Schematic of the proposed chiral J-aggregates of cyanine dye molecules on the lysine-derived amphiphile assembly. The double bilayer structure is omitted for clarity.

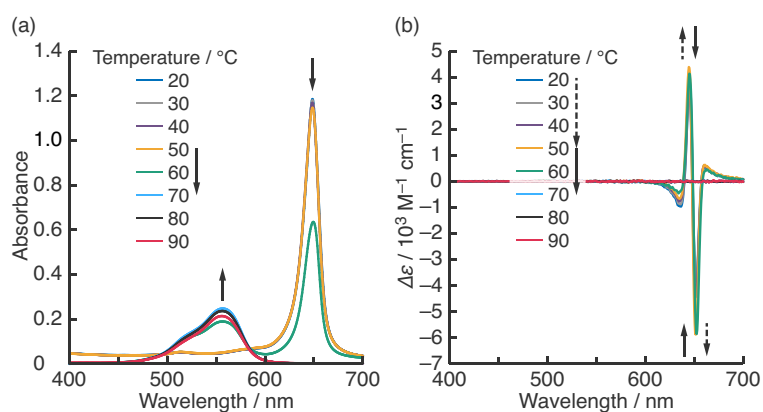

**Fig. S12** (a) Visible absorption and (b) CD spectra of Cy2 (0.03 mM) in the presence of 12-Ly (0.6 mM) in water at different temperatures (20–90 °C); path length: 0.1 cm.

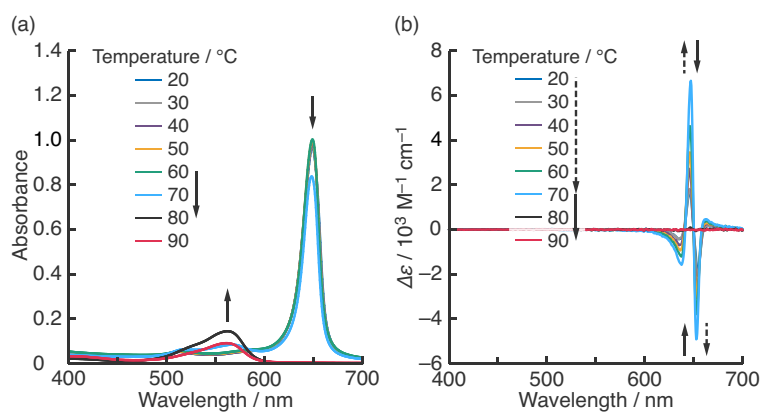

**Fig. S13** (a) Visible absorption and (b) CD spectra of Cy2 (0.03 mM) in the presence of 14-Ly (0.6 mM) in water at different temperatures (20–90 °C); path length: 0.1 cm.

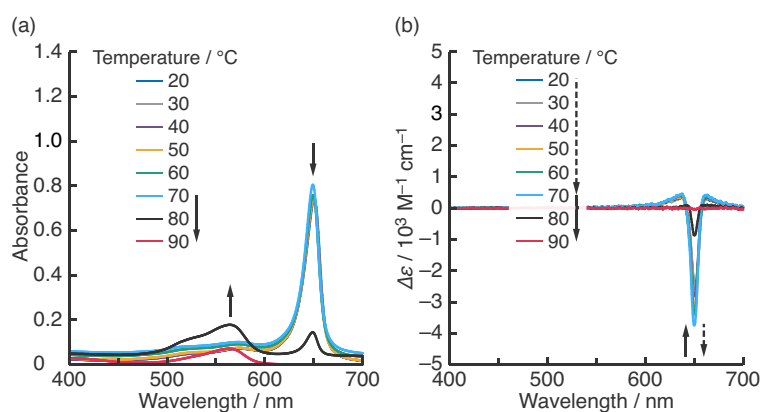

**Fig. S14** (a) Visible absorption and (b) CD spectra of Cy2 (0.03 mM) in the presence of 16-Ly (0.6 mM) in water at different temperatures (20–90 °C); path length: 0.1 cm.

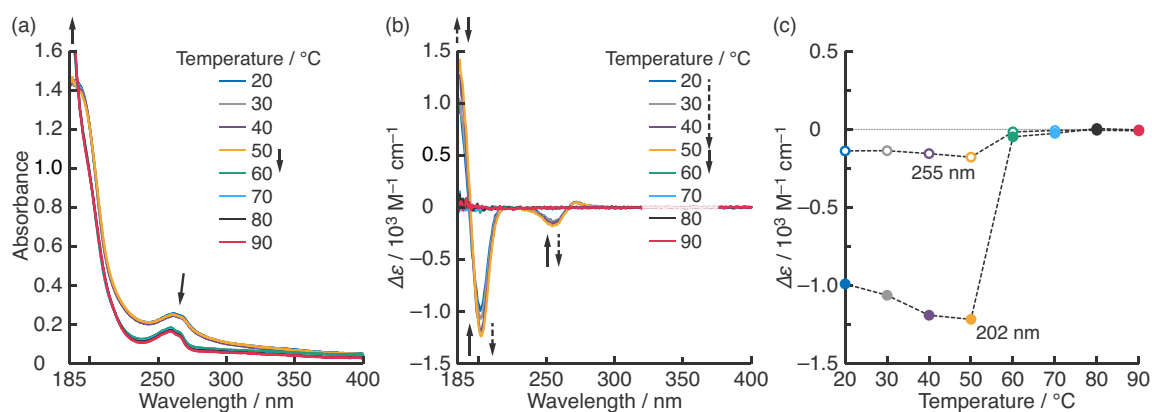

**Fig. S15** (a) UV absorption and (b) CD spectra of 12-Ly (0.6 mM) in water at different temperatures; path length: 0.1 cm. (c) Variation in  $\Delta\epsilon$  at 202 and 255 nm as a function of temperatures obtained from (b).

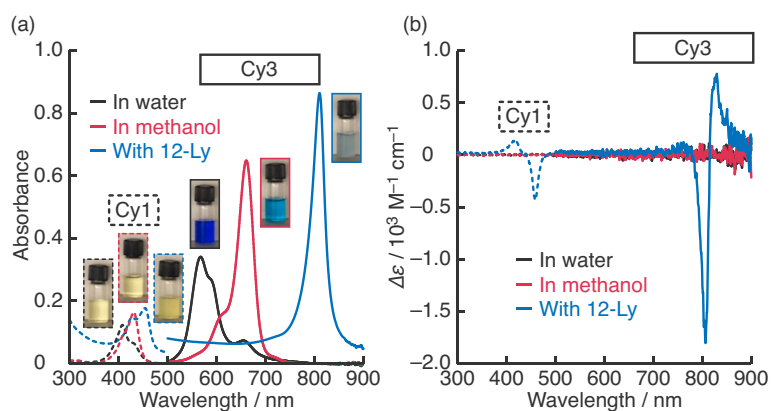

**Fig. S16** (a) UV-visible absorption and (b) CD spectra of Cy1 and Cy3 (0.03 mM) in the presence and absence of 12-Ly (0.6 mM) in water and alone in methanol at 20 °C; path length: 0.1 cm. Dashed and solid lines denote the spectra of Cy1 and Cy3, respectively. Insets in (a) show images of the Cy1/Cy3–12-Ly aqueous mixture, Cy1/Cy3 aqueous solution, and Cy1/Cy3 methanol solution at 20 °C in daylight.

### **Author contributions**

**N. Ryu:** Conceptualization (lead), Data curation, Formal analysis, Funding acquisition, Methodology, Project administration, Resources, Supervision, Visualization, and Writing – original draft (lead). **Y. Yamamoto:** Formal analysis, Investigation (lead), Validation, Visualization, and Writing – original draft. **Y. Okazaki:** Investigation and Writing – review & editing. **N. Hano:** Investigation. **Y. Iwamoto:** Investigation. **T. Shirosaki:** Investigation and Writing – review & editing. **S. Nagaoka:** Resources. **R. Oda:** Resources, Funding acquisition, and Writing – review & editing. **H. Ihara:** Conceptualization and Writing – review & editing. **M. Takafuji:** Data curation, Resources, Supervision, and Writing – review & editing.
